# Supplementary material
Source: ML conference proceedings conference paper supplement (https://proceedings.mlr.press/v97/kalyan19a.html)
Supplement: Supplementary file [file kalyan19a-supp.pdf]

---

# Trainable Decoding of Sets of Sequences for Neural Sequence Models

---

Ashwin Kalyan<sup>1</sup> Peter Anderson<sup>1</sup> Stefan Lee<sup>1</sup> Dhruv Batra<sup>1,2</sup>

| Split        | Facility Location Accuracy |        |
|--------------|----------------------------|--------|
|              | CIDEr                      | SPICE  |
| (submodular) | 1.5995                     | 0.1745 |
| (arbitrary)  | 1.5324                     | 0.1723 |

Table 1. Constraining the subset selector to be submodular promotes a favorable inductive bias as observed by the deterioration in performance when using arbitrary function to obtain utility.

**Using Non-submodular Functions.** As discussed in Section 2.3, not restricting the subset selection function  $f$  to be submodular, reduces our approach to a *trainable* variant of DivMBest. While this strategy allows for more complex functions to be learnt, it lacks the theoretical guarantees of submodular maximization and can potentially make the learning hard; owing to a larger model class.

---

<sup>1</sup>School of Interactive Computing, Georgia Tech, Atlanta, GA, USA <sup>2</sup>Facebook AI Research, Menlo Park, CA, USA. Correspondence to: Ashwin Kalyan <ashwinkv@gatech.edu>.
